# Supplementary material for: Escherichia coli O8:H8 Carrying a Novel Variant of the Heat-Labile Enterotoxin LT2 Gene Caused Outbreaks of Diarrhea
Source: PubMed Central journal article supplement — Open Forum Infect Dis. 2020 Jan 14;7(1):ofaa021. doi: 10.1093/ofid/ofaa021 (PMC6988837; doi:10.1093/ofid/ofaa021), 2020-01-14
Supplement: ofaa021_suppl_supplementary_material.pdf [file ofaa021_suppl_supplementary_material.pdf]

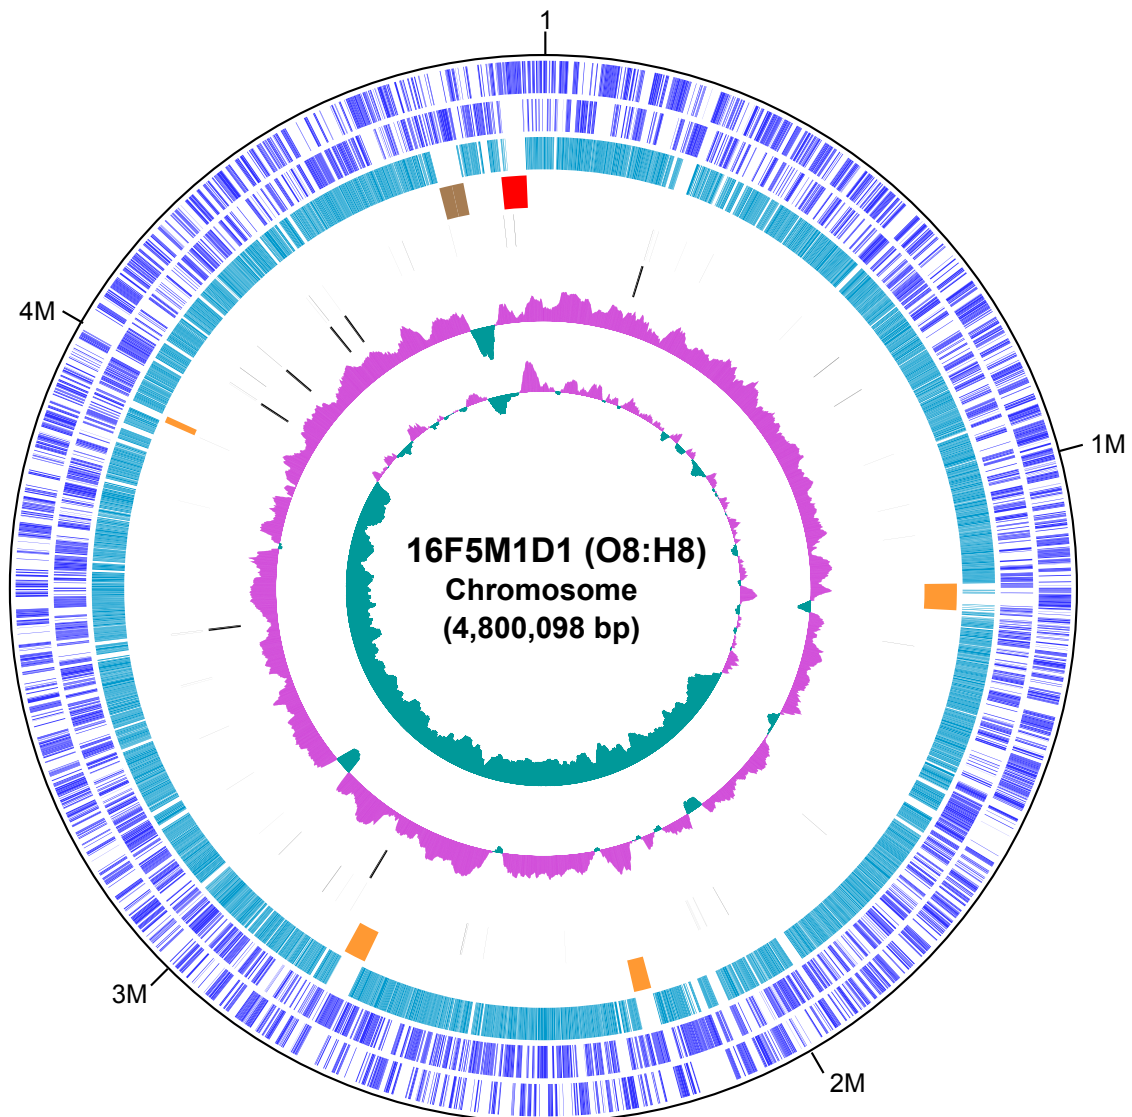

**Supplementary Figure 1. Circular map of the *E. coli* 16F5M1D1 (O8:H8) chromosome.**

The outermost to innermost circles are as follows: 1st, nucleotide sequence positions; 2nd and 3rd, CDSs transcribed clockwise and counterclockwise, respectively; 4th, CDSs conserved in *E. coli* K-12 ( $\geq 80\%$  identity and  $\geq 60\%$  coverage); 5th, locations of prophages (PPs) and integrative elements (IEs) (red: LT PPs, orange: other PPs, brown: IEs); 6th, rRNA; 7th, tRNA; 8th, GC content; and 9th, GC skew.

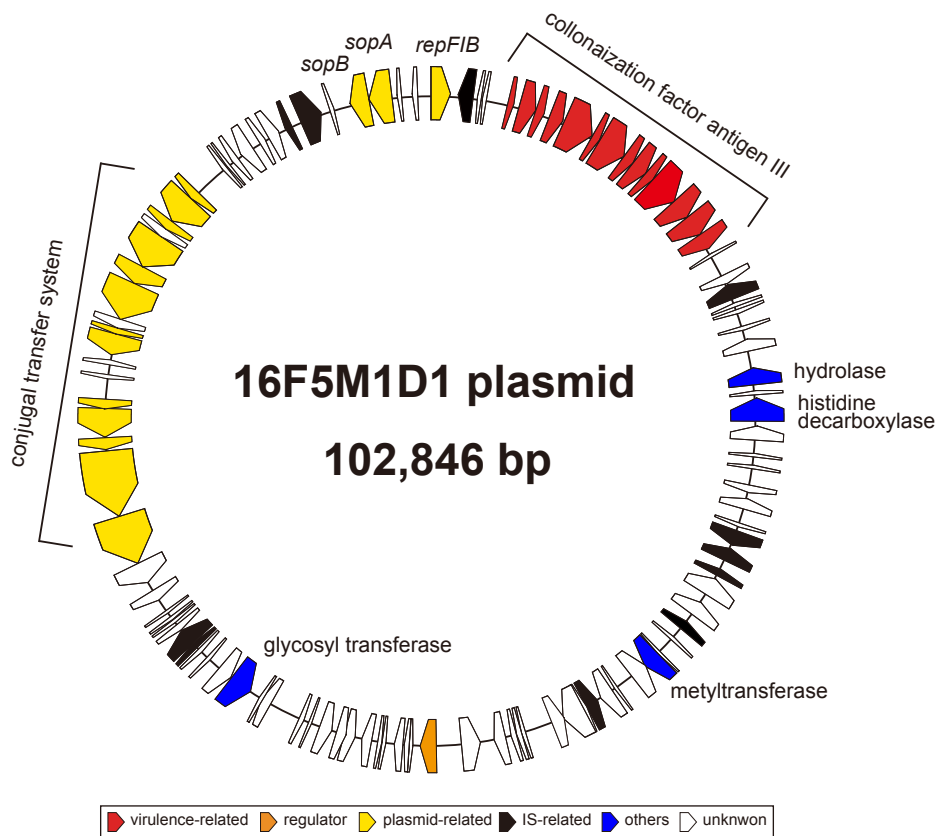

**Supplementary Figure 2. Genetic structures the CFAllI-encoding plasmid.**

**Supplementary Table1. General genomic features of *E. coli* O8H8 strain 16F5M1D1**

|                        |           |
|------------------------|-----------|
| Chromosome             |           |
| Length (bp)            | 4,800,098 |
| CDSs                   | 4438      |
| rRNA operons           | 22        |
| tRNAs                  | 91        |
| Prophages              | 5         |
| Integrative elements   | 2         |
| Plasmid 1              |           |
| Length (bp)            | 102,846   |
| CDSs                   | 111       |
| Plasmid 2              |           |
| Length (bp)            | 3,717     |
| CDSs                   | 5         |
| Plasmid 3              |           |
| Length (bp)            | 2,732     |
| CDSs                   | 3         |
| Total genome size (bp) | 4,909,393 |

**Supplementary Table 2. Reference strains of *E. coli* and *Escherichia* cryptic clade 1 used in this study**

| Strain                      | pathotype      | Phylogroup | O serogroup | H serogroup | Accession no.   |
|-----------------------------|----------------|------------|-------------|-------------|-----------------|
| PCN033                      | ExPEC          | D          | O11         | UT          | NZ_CP006632     |
| <i>Escherichia coli</i> 042 | EAEC           | D          | O44         | H18         | NC_017626       |
| UMN026                      | ExPEC          | D          | O17         | H18         | NC_011751       |
| IAI39                       | ExPEC          | F          | O7          | H45         | NC_011750       |
| SMS-3-5                     | Non-pathogenic | F          | O19         | H34         | NC_010498       |
| 2009C-3133                  | STEC           | F          | O119        | H4          | NZ_CP013025     |
| E2348/69                    | EPEC           | B2         | O127        | H6          | NC_011601       |
| SE15                        | Non-pathogenic | B2         | O150        | H5          | NC_013654       |
| Nissle1917                  | Non-pathogenic | B2         | O6          | H1          | CP007799        |
| upec-29                     | UPEC           | B2         | O6          | H31         | NZ_JSIG01000007 |
| LF82                        | AIEC           | B2         | O83         | H1          | CU651637        |
| ED1a                        | Non-pathogenic | B2         | O81         | H27         | NC_011745       |
| APEC O1                     | APEC           | B2         | O1          | H7          | CP000468        |
| RM13514                     | STEC           | D          | O145        | H28         | CP006027        |
| Sakai                       | STEC           | E          | O157        | H7          | NC_002695       |
| CB9615                      | EPEC           | E          | O55         | H7          | NC_013941       |
| F6326-C1                    | ETEC           | E          | O169        | H41         | NZ_CP024263     |
| CFSAN004179                 | STEC           | A          | O136        | H16         | CP013662        |
| CFSAN051542                 | Non-pathogenic | UT         | O18ac       | H14         | NZ_CP020835     |
| F5505-C1                    | ETEC           | A          | O25         | H16         | NZ_CP020835     |
| TW10598                     | ETEC           | A          | O6          | H16         | NZ_CM007915     |
| H10407                      | ETEC           | A          | O78         | H11         | NC_017633       |
| MG1655                      | Non-pathogenic | A          | O16         | H48         | NC_000913       |
| UMNF18                      | ETEC           | A          | O147        | H4          | NZ_CP002890     |
| UMNK88                      | ETEC           | A          | O149        | H10         | NC_017641       |
| PCN061                      | ExPEC          | A          | O9          | H4          | NZ_CP006636     |
| H1827/12                    | ExPEC          | A          | O7          | H4          | NZ_CP013031     |
| APECO78                     | APEC           | C          | O78         | H9          | NC_020163       |
| SEC470                      | ETEC           | C          | O4          | H11         | NZ_CP007594     |
| 16-9255                     | STEC           | B1         | O121        | H19         | CP022407        |
| 13E0780                     | STEC           | B1         | O156        | H25         | NZ_CP020106     |
| ATCC9637                    | Non-pathogenic | B1         | O6          | H49         | CP002185        |
| E24377A                     | ETEC           | B1         | O139        | H28         | CP000800        |
| 90-9281                     | ETEC           | B1         | O128        | H27         | NZ_CP024243     |
| SE11                        | Non-pathogenic | B1         | O152        | H28         | AP009240        |
| HUSEC2011                   | STEC           | B1         | O104        | H4          | NZ_HF572917     |
| IAI1                        | Non-pathogenic | B1         | O8          | H19         | NC_011741       |
| 09-00049                    | STEC           | B1         | O168        | H8          | NZ_CP015228     |
| RM7190                      | STEC           | B1         | O91         | H21         | NZ_CP015244     |
| CFSAN029787                 | EIEC           | B1         | O96         | H19         | CP011416        |
| F5176C6                     | ETEC           | B1         | O167        | H5          | NZ_CP024667     |
| 12009                       | STEC           | B1         | O103        | H2          | AP010958        |
| 11128                       | STEC           | B1         | O111        | H8          | AP010960        |
| 11368                       | STEC           | B1         | O26         | H11         | NC_013361       |
| 13E0767                     | EPEC           | B1         | O156        | H8          | NZ_CP020107     |
| TW15838                     | Non-pathogenic | clade1     | Gp9         | H45         | AEJX00000000    |

UT: untypeable
